# Supplementary material
Source: PubMed Central journal article supplement (PMC6948870)
Supplement: jciinsight-4-131692-s088.pdf [file jciinsight-4-131692-s088.pdf]

## Supplementary data

**Supplementary Table 1: Mouse real-time RT-PCR (qPCR) primers**

| Name             | 5' primer              | 3' primer              |
|------------------|------------------------|------------------------|
| Adiponectin      | TGTTCTCTTAATCCTCCCA    | CCAACCTGCACAAGTTCCCTT  |
| Alp              | CCAACCTCTTTTGTGCCAGAGA | GGCTACATTGGTGTGAGCTTTT |
| aP2              | GGGGCCAGGCTTCTATTCC    | GGAGCTGGGTAGGTATGGG    |
| $\beta$ -catenin | ATGGAGCCGGACAGAAAAGC   | CTTGCCACTCAGGGAAGGA    |
| C/ebp $\alpha$   | CAAGAACAGCAACGAGTACCG  | GTCACTGGTCAACTCCAGCAC  |
| Col1a1           | GCTCCTCTTAGGGGCCACT    | CCACGTCTCACCATTGGGG    |
| Dkk1             | CATGAGGCACGCTATGTGCTG  | GCGGCGTTGTGGTCATTACC   |
| Gsk-3 $\beta$    | TGGCAGCAAGGTAACCACAG   | CGGTTCTTAAATCGCTTGTCTG |
| Gapdh            | CAGTGCCAGCCTCGTCCCGT   | CTGCAAATGGCAGCCCTGGTGA |
| Ocn              | AGGGAGGATCAAGTCCCG     | GAACAGACTCCGGCGCTA     |
| Osx              | ATGGCGTCCTCTCTGCTTG    | TGAAAGGTCAGCGTATGGCTT  |
| Pinch1           | CAGCGTCCTTGAAGCTAATGG  | TTACTGTTACGATCTTCTCAGC |
| Ppar $\gamma$    | TCGCTGATGCACTGCCTATG   | GAGAGGTCCACAGAGCTGATT  |
| Pref-1           | GACCCACCCTGTGACCCC     | CAGGCAGCTCGTGCACCCC    |
| Rankl            | CAGCATCGCTCTGTTCTGTA   | CTGCGTTTTTCATGGAGTCTCA |
| Runx2            | AACGATCTGAGATTTGTGGGC  | CCTGCGTGGGATTTCTTGTT   |
| Sclerostin       | AGCCTTCAGGAATGATGCCAC  | CTTTGGCGTCATAGGGATGGT  |
| Taz              | CCCCCGCTTTGGACAGAAAAT  | AGGCTGGAAATGATTGTGGAG  |
| Tnfrsf11b        | ACCCAGAAACTGGTCATCAGC  | CTGCAATACACACTCATCACT  |

|      |                      |                              |
|------|----------------------|------------------------------|
| Yap1 | ACCCTCGTTTTGCCATGAAC | TCCACCTGGTTCACCTCATGGTC<br>C |
|------|----------------------|------------------------------|

### Supplementary Table 2: Antibody information

| Antibody                | Company   | Catalog # | Application/Dilution      |
|-------------------------|-----------|-----------|---------------------------|
| $\beta$ -Actin          | ZSbio     | TA-09     | WB (1:2000)               |
| aP2                     | Abcam     | Ab92501   | WB (1:1000)               |
| Active $\beta$ -catenin | Millipore | 05-665    | WB (1:2000)               |
| $\beta$ -catenin        | CST       | 9562S     | WB (1:1000), IHC (1:1000) |
| p-Caspase 3             | Abcam     | ab2302    | WB (1:1000)               |
| Caspase 3               | Abcam     | ab90437   | WB (1:1000)               |
| p-Caspase 8             | CST       | 9429      | WB (1:1000)               |
| Caspase 8               | CST       | 4790      | WB (1:1000)               |
| Dmp1                    | Abcam     | ab103203  | IF (1:200)                |
| C/ebp $\alpha$          | Abcam     | ab40764   | WB (1:1000)               |
| Gapdh                   | ZSbio     | TA-08     | WB (1:2000)               |
| active Gsk-3 $\beta$    | CST       | 9322      | WB (1:1000)               |
| Gsk-3 $\beta$           | CST       | 12456     | WB (1:1000)               |
| Ilk                     | BD        | 611802    | WB (1:1000)               |
| Osx                     | Abcam     | ab22552   | WB (1:1000), IHC (1:1000) |
| $\alpha$ -Parvin        | CST       | 8190      | WB (1:1000),              |
| Pinch1                  | Abcam     | ab108609  | WB (1:1000), IHC (1:300)  |
| Ppar $\gamma$           | CST       | 2435      | WB (1:1000)               |

|                |             |          |                          |
|----------------|-------------|----------|--------------------------|
| Phalloidin-488 | Invitrogen™ | A12379   | IF (1:200)               |
| Runx2          | CST         | ab76956  | WB (1:1000)              |
| Rankl          | Santa Cruz  | sc-52950 | IHC (1:1000)             |
| Sclerostin     | Abcam       | Ab63097  | IHC (1:200), WB (1:1000) |
| Yap1/Taz       | CST         | 8418     | WB (1:1000)              |
